# Supplementary material for: Trioxolone Methyl, a Novel Cyano Enone-Bearing 18βH-Glycyrrhetinic Acid Derivative, Ameliorates Dextran Sulphate Sodium-Induced Colitis in Mice
Source: MDPI journal article supplement (doi:10.3390/molecules25102406), 2020-05-21

# Trioxolone methyl, a novel cyano enone-bearing 18 $\beta$ H-glycyrrhetic acid derivative, ameliorates dextran sulphate sodium-induced colitis in mice

Andrey V. Markov <sup>1,\*§</sup>, Aleksandra V. Sen'kova <sup>1§</sup>, Oksana V. Salomatina <sup>1,2</sup>, Evgeniya B. Logashenko <sup>1</sup>, Dina V. Korchagina <sup>2</sup>, Nariman F. Salakhutdinov <sup>2</sup> and Marina A. Zenkova <sup>1</sup>

<sup>1</sup> Institute of Chemical Biology and Fundamental Medicine, Siberian Branch of the Russian Academy of Sciences, Lavrent'ev ave., 8, 630090 Novosibirsk, Russia; [alsenko@mail.ru](mailto:alsenko@mail.ru) (A.V.S.), [evg\\_log@niboch.nsc.ru](mailto:evg_log@niboch.nsc.ru) (E.B.L.), [marzen@niboch.nsc.ru](mailto:marzen@niboch.nsc.ru) (M.A.Z.)

<sup>2</sup> N.N. Vorozhtsov Novosibirsk Institute of Organic Chemistry, Siberian Branch of the Russian Academy of Sciences, Lavrent'ev ave., 9, 630090 Novosibirsk, Russia; [ana@nioch.nsc.ru](mailto:ana@nioch.nsc.ru) (O.V.S.), [korchaga@nioch.nsc.ru](mailto:korchaga@nioch.nsc.ru) (D.V.K.), [anvar@nioch.nsc.ru](mailto:anvar@nioch.nsc.ru) (N.F.S.)

\* Correspondence: [andmrkv@gmail.com](mailto:andmrkv@gmail.com) (A.V.M.); Tel.: +7-383-363-51-61

Trioxolone methyl [Methyl 2-cyano-3,12,19-trioxolean-1(2),9(11),13(18)-trien-30-oate]:  $^1\text{H}$  NMR ( $\text{CDCl}_3$ )

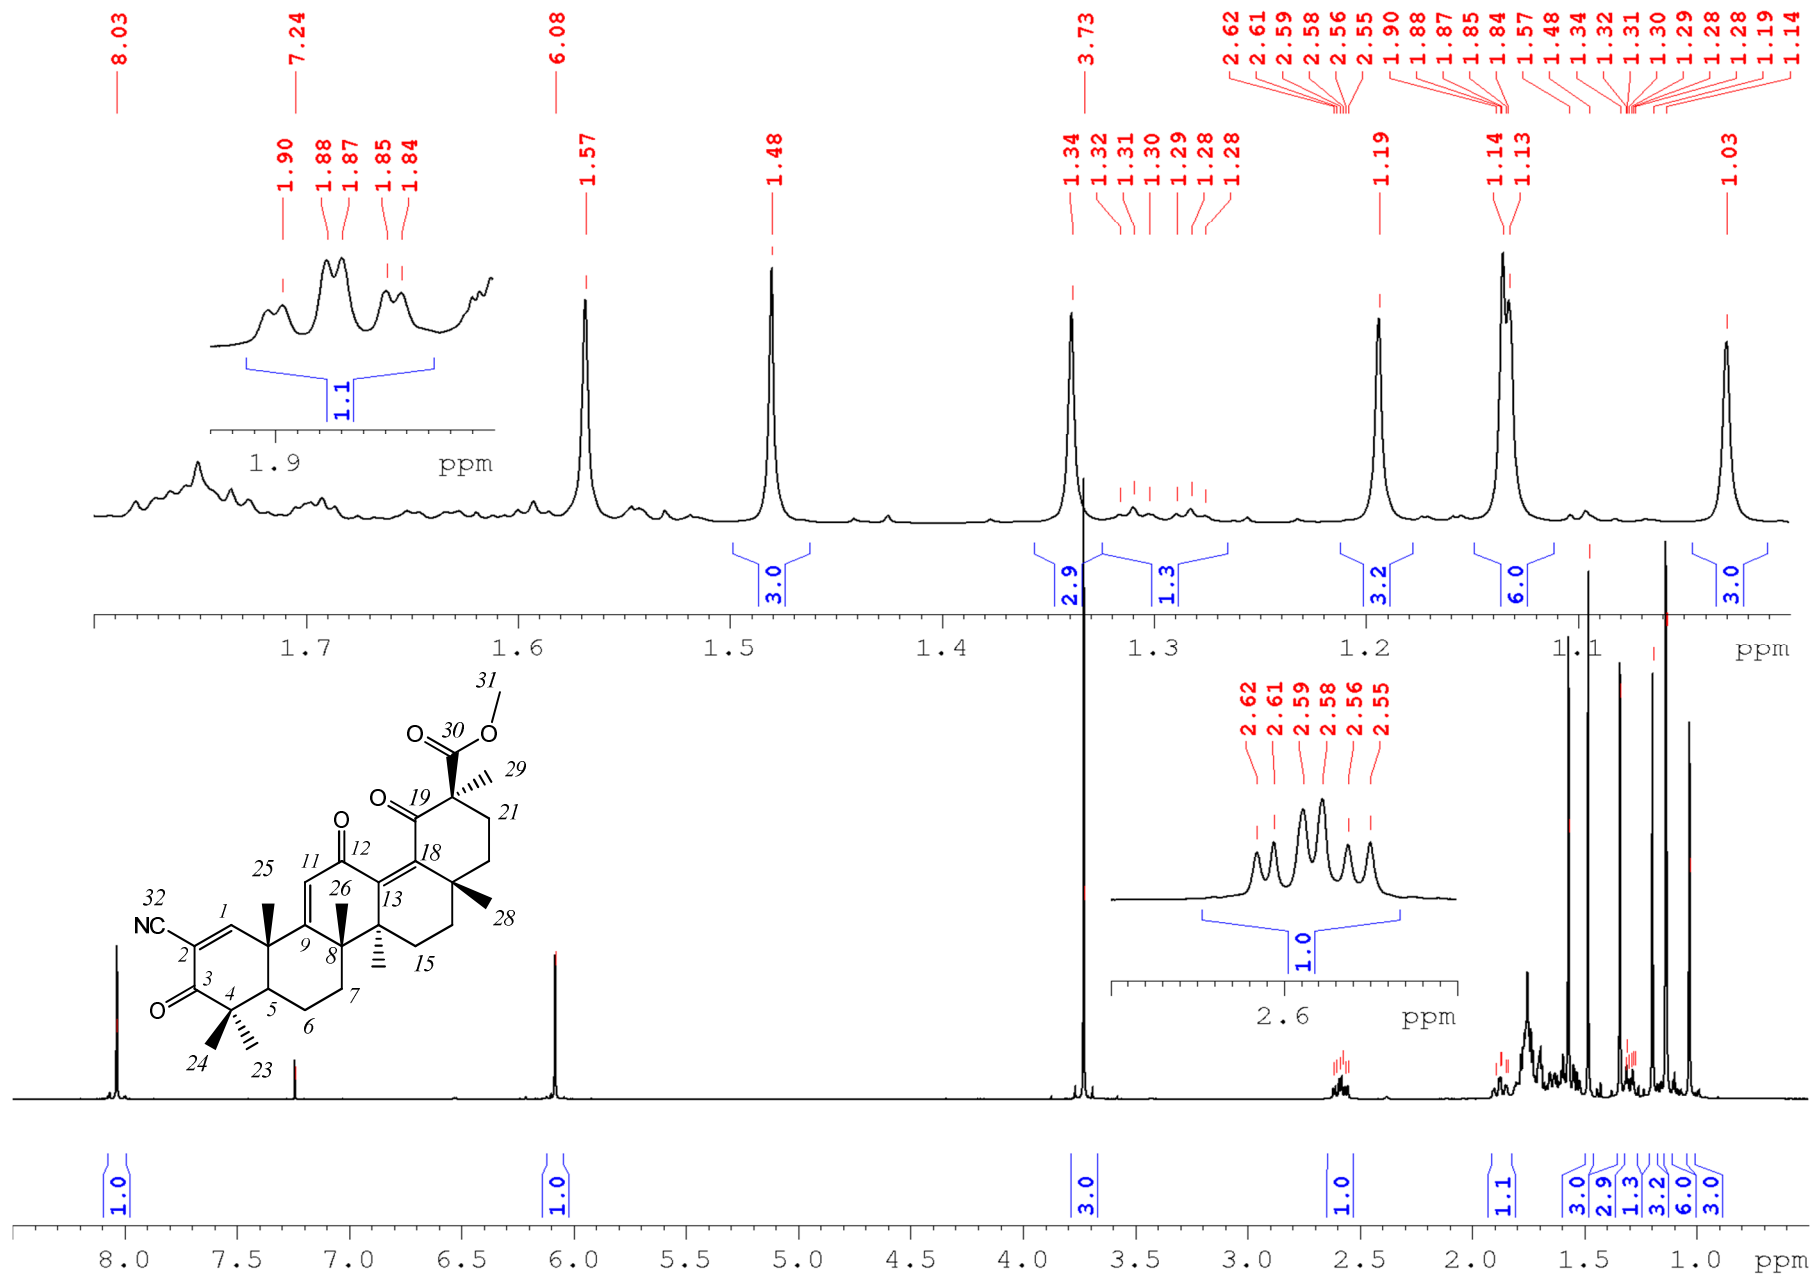

Trioxolone methyl [Methyl 2-cyano-3,12,19-trioxoolean-1(2),9(11),13(18)-trien-30-oate]:  $^{13}\text{C}$  NMR (J-MOD; 125 MHz) ( $\text{CDCl}_3$ )

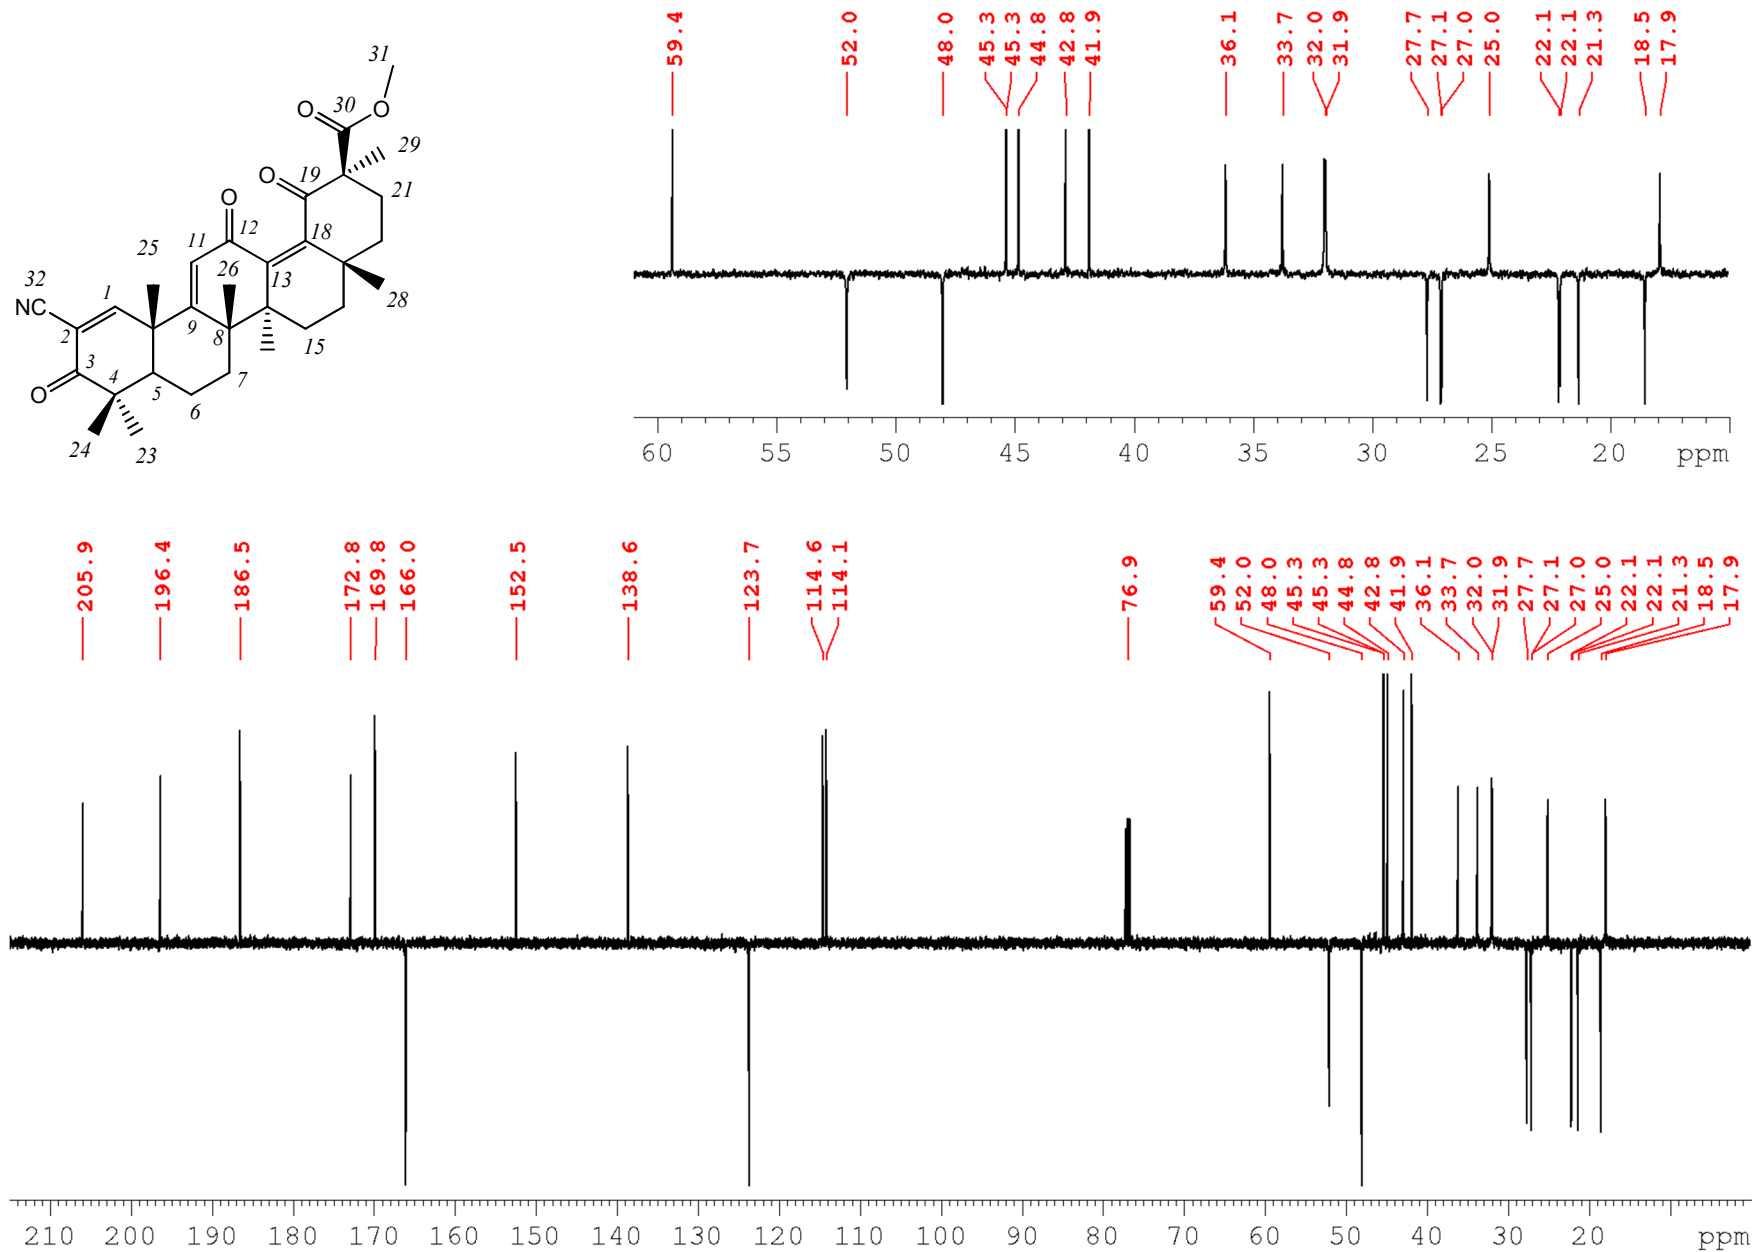

# Trioxolone methyl [Methyl 2-cyano-3,12,19-trioxoolean-1(2),9(11),13(18)-trien-30-oate]: IR (KBr)

|                                            |                     |  |                          |                      |                                     |
|--------------------------------------------|---------------------|--|--------------------------|----------------------|-------------------------------------|
| Title Trioxolone methyl KBr 150:1 Tensor27 |                     |  | Origin                   |                      |                                     |
| File Name                                  |                     |  | Date Stamp 21/4/2020     |                      | Date 21 Apr 2020 18:00:06           |
| Technique Infrared                         | Spectral Region IR  |  | X Axis Wavenumber (cm-1) | Y Axis Transmittance | Spectrum Range 399.2111 - 3997.8959 |
| Points Count 1867                          | Data Spacing 1.9286 |  |                          |                      |                                     |

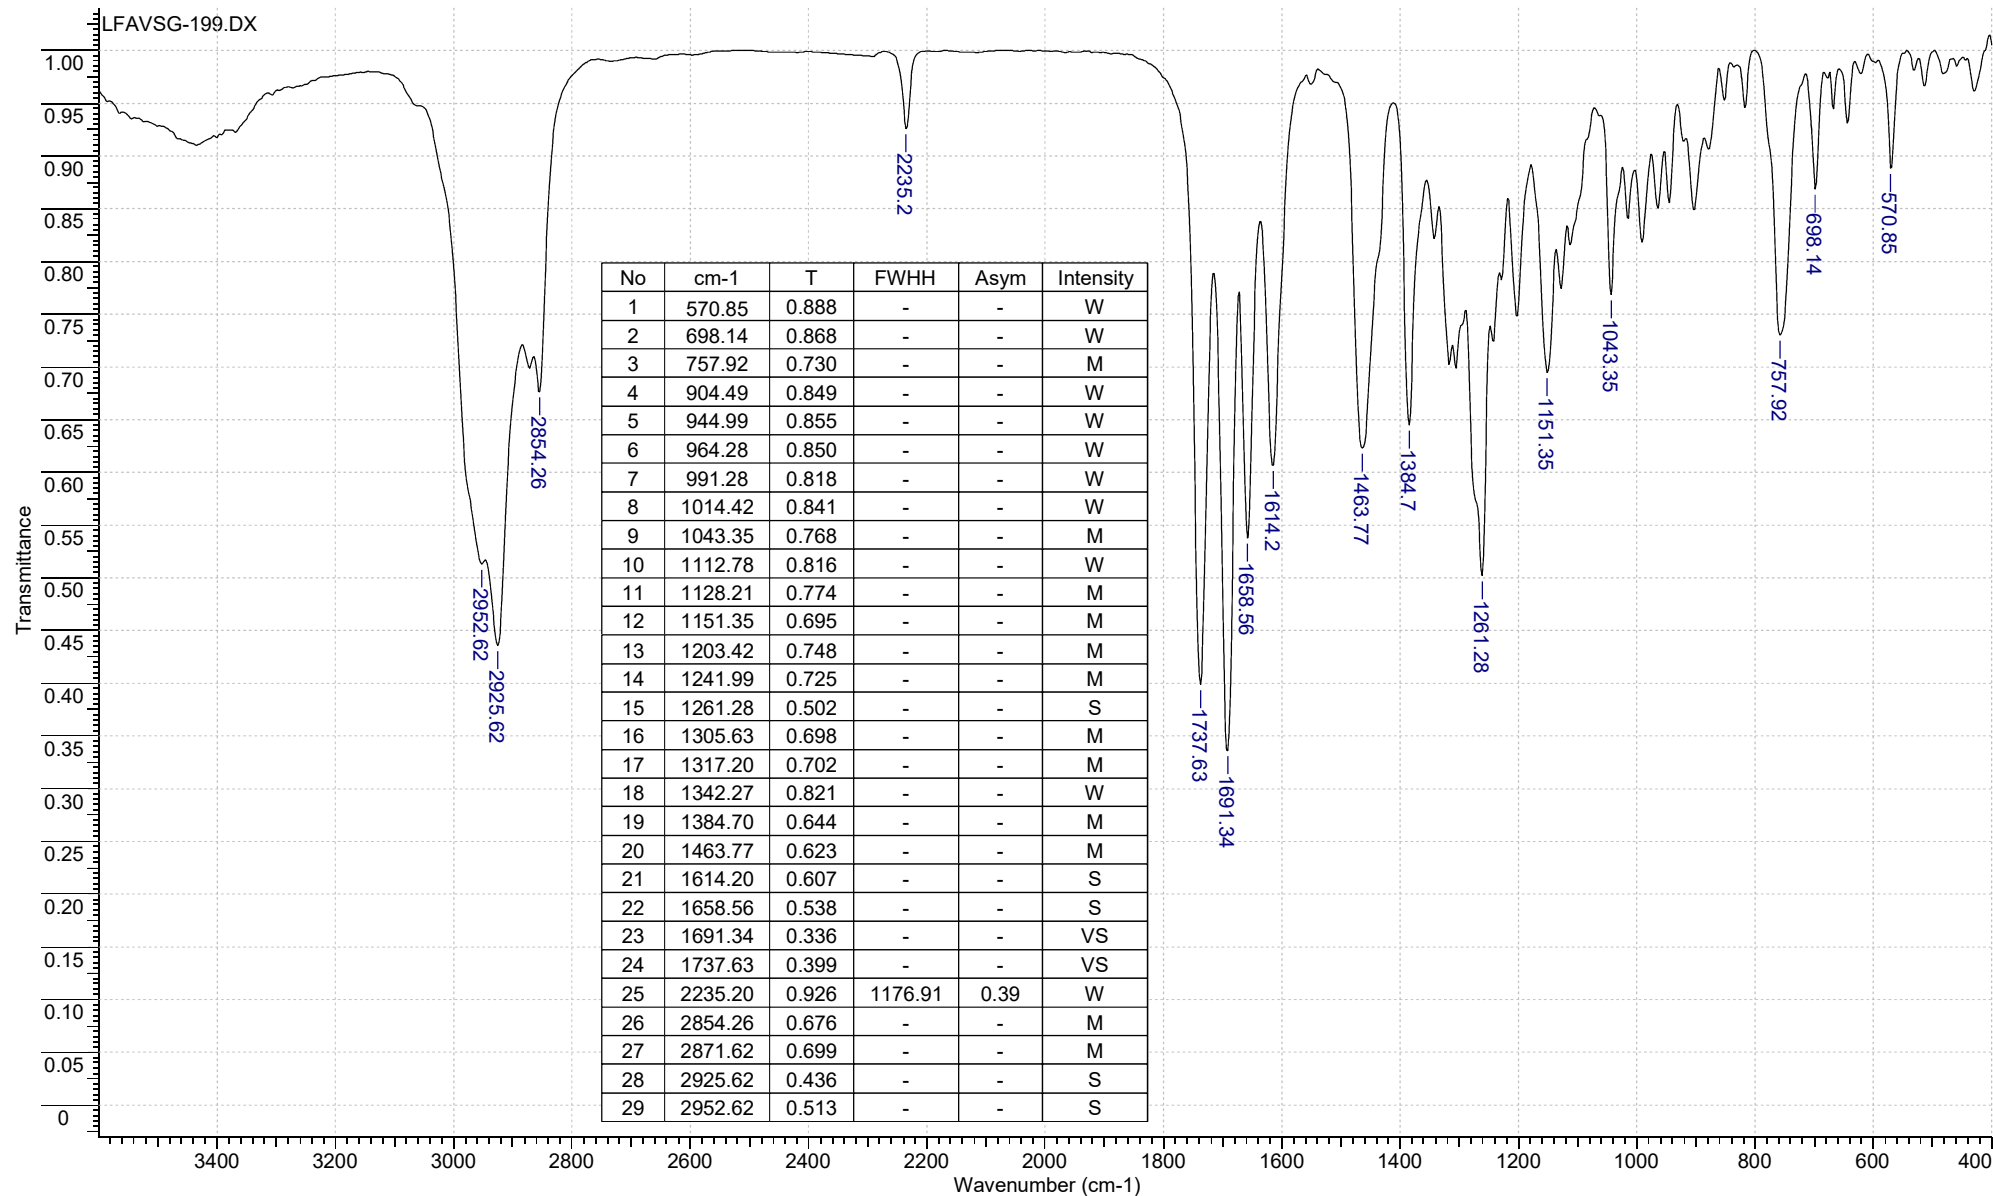

Supplement: s1 [file s1]
