# Supplementary material for: Trioxolone Methyl, a Novel Cyano Enone-Bearing 18βH-Glycyrrhetinic Acid Derivative, Ameliorates Dextran Sulphate Sodium-Induced Colitis in Mice
Source: MDPI journal article supplement (doi:10.3390/molecules25102406), 2020-05-21
Supplement: s1 [file s1]

# Trioxolone methyl, a novel cyano enone-bearing 18 $\beta$ H-glycyrrhetic acid derivative, ameliorates dextran sulphate sodium-induced colitis in mice

Andrey V. Markov <sup>1,\*§</sup>, Aleksandra V. Sen'kova <sup>1,§</sup>, Oksana V. Salomatina <sup>1,2</sup>, Evgeniya B. Logashenko <sup>1</sup>, Dina V. Korchagina <sup>2</sup>, Nariman F. Salakhutdinov <sup>2</sup> and Marina A. Zenkova <sup>1</sup>

<sup>1</sup> Institute of Chemical Biology and Fundamental Medicine, Siberian Branch of the Russian Academy of Sciences, Lavrent'ev ave., 8, 630090 Novosibirsk, Russia; [alsenko@mail.ru](mailto:alsenko@mail.ru) (A.V.S.), [evg\\_log@niboch.nsc.ru](mailto:evg_log@niboch.nsc.ru) (E.B.L.), [marzen@niboch.nsc.ru](mailto:marzen@niboch.nsc.ru) (M.A.Z.)

<sup>2</sup> N.N. Vorozhtsov Novosibirsk Institute of Organic Chemistry, Siberian Branch of the Russian Academy of Sciences, Lavrent'ev ave., 9, 630090 Novosibirsk, Russia; [ana@nioch.nsc.ru](mailto:ana@nioch.nsc.ru) (O.V.S.), [korchaga@nioch.nsc.ru](mailto:korchaga@nioch.nsc.ru) (D.V.K.), [anvar@nioch.nsc.ru](mailto:anvar@nioch.nsc.ru) (N.F.S.)

\* Correspondence: [andmrkv@gmail.com](mailto:andmrkv@gmail.com) (A.V.M.); Tel.: +7-383-363-51-61

§ These authors contributed equally to this work

**Supplementary Table S1:** The list of predicted primary protein targets of TM.

| Target prediction tool | Target ID | Target name                                          |
|------------------------|-----------|------------------------------------------------------|
| PPB2                   | Hsd11b1   | Hydroxysteroid 11-Beta Dehydrogenase 1               |
|                        | Kcnh2     | Potassium Voltage-Gated Channel Subfamily H Member 2 |
|                        | Nr3c1     | Glucocorticoid Receptor                              |
|                        | Oprm1     | Opioid Receptor Mu 1                                 |
|                        | Kdr       | Kinase Insert Domain Receptor                        |
|                        | Slc6a4    | Sodium-Dependent Serotonin Transporter               |
|                        | Gpr119    | G Protein-Coupled Receptor 119                       |
|                        | Hsd11b2   | Hydroxysteroid 11-Beta Dehydrogenase 2               |
|                        | Gsk3b     | Glycogen Synthase Kinase 3 Beta                      |
|                        | Chrm3     | Muscarinic Acetylcholine Receptor M3                 |
|                        | Cyp19a1   | Cytochrome P450 Family 19 Subfamily A Member 1       |
|                        | Oprd1     | Opioid Receptor Delta 1                              |
|                        | Cnr1      | Cannabinoid Receptor 1                               |
|                        | Oprk1     | Opioid Receptor Kappa 1                              |
|                        | Tnf       | Tumor Necrosis Factor-Alpha                          |
|                        | Drd2      | Dopamine Receptor D2                                 |
| PPB2, STITCH           | Nos2      | Inducible NO Synthase                                |
| STITCH                 | Nos1      | Constitutive NO Synthase                             |
|                        | Src       | Proto-Oncogene Tyrosine-Protein Kinase Src           |
|                        | Myc       | MYC Proto-Oncogene, BHLH Transcription Factor        |
|                        | Akt1      | AKT Serine/Threonine Kinase 1                        |
|                        | Stat3     | Signal Transducer And Activator Of Transcription 3   |
|                        | Mapk8     | Mitogen-Activated Protein Kinase 8                   |
|                        | Hmox1     | Heme Oxygenase 1                                     |
|                        | Tert      | Telomerase Reverse Transcriptase                     |
|                        | Dnmt1     | DNA Methyltransferase 1                              |
